# Supplementary material
Source: publisher figshare collection journal article supplement (https://sage.figshare.com/ndownloader/files/14427563)
Supplement: Supplementary file 1 [file 14427563]

Stinchcombe, A., Patterson, L., Mullen, N., Weaver, B., & Bédard, M. (2019). Measuring the impact of driving status: The Centre for Research on Safe Driving – Impact of Driving Status on Quality of Life (CRSD-IDSQoL) tool. *Canadian Journal of Occupational Therapy, 86*(1).

**Appendix A: Centre for Research on Safe Driving: Impact of Driving Status on Quality of Life (CRSD-IDSQoL)**

|                                                                                                          |                                                                                                                                                                                                                                                                                                                                                                                                                                                                                                                                                                                                                                                                                                                                                                                                                                                                                                                                                                                                                                                                                                                                                                                                                                                                                |                                                    |                                                       |                                              |                                                       |                                                 |                                      |
|----------------------------------------------------------------------------------------------------------|--------------------------------------------------------------------------------------------------------------------------------------------------------------------------------------------------------------------------------------------------------------------------------------------------------------------------------------------------------------------------------------------------------------------------------------------------------------------------------------------------------------------------------------------------------------------------------------------------------------------------------------------------------------------------------------------------------------------------------------------------------------------------------------------------------------------------------------------------------------------------------------------------------------------------------------------------------------------------------------------------------------------------------------------------------------------------------------------------------------------------------------------------------------------------------------------------------------------------------------------------------------------------------|----------------------------------------------------|-------------------------------------------------------|----------------------------------------------|-------------------------------------------------------|-------------------------------------------------|--------------------------------------|
| <b>What is your driving status?</b> <i>(Please check one below and answer the applicable questions.)</i> |                                                                                                                                                                                                                                                                                                                                                                                                                                                                                                                                                                                                                                                                                                                                                                                                                                                                                                                                                                                                                                                                                                                                                                                                                                                                                |                                                    |                                                       |                                              |                                                       |                                                 |                                      |
| <b>I currently do NOT drive →</b>                                                                        | <p><b>1.</b> Do you have a driver's license or did you have one in the past? <input type="checkbox"/> Yes <input type="checkbox"/> No</p> <p><b>If YES:</b></p> <p><b>2.</b> Did you stop driving <input type="checkbox"/> Voluntarily or <input type="checkbox"/> Involuntarily?</p> <p><b>3.</b> Why did you stop driving?</p> <table border="0"><tr><td><input type="checkbox"/> Failed driving evaluation</td><td><input type="checkbox"/> Family/Friends advised me to</td></tr><tr><td><input type="checkbox"/> Told by a physician</td><td><input type="checkbox"/> Government/License authority</td></tr><tr><td><input type="checkbox"/> Crash/Driving incident</td><td><input type="checkbox"/> Other _____</td></tr></table> <p><b>4.</b> What year did you first obtain your driver's license? _____</p> <p><b>5.</b> In what year did you stop driving? _____</p> <p><b>6.</b> In the year before you stopped driving, how many days a week did you drive?<br/><i>(Circle one)</i> 1 2 3 4 5 6 7</p> <p><b>7.</b> Do you plan to resume driving? <input type="checkbox"/> Yes <input type="checkbox"/> Maybe <input type="checkbox"/> No</p> <p><b>8.</b> Does someone else in your household drive? <input type="checkbox"/> Yes <input type="checkbox"/> No</p> | <input type="checkbox"/> Failed driving evaluation | <input type="checkbox"/> Family/Friends advised me to | <input type="checkbox"/> Told by a physician | <input type="checkbox"/> Government/License authority | <input type="checkbox"/> Crash/Driving incident | <input type="checkbox"/> Other _____ |
| <input type="checkbox"/> Failed driving evaluation                                                       | <input type="checkbox"/> Family/Friends advised me to                                                                                                                                                                                                                                                                                                                                                                                                                                                                                                                                                                                                                                                                                                                                                                                                                                                                                                                                                                                                                                                                                                                                                                                                                          |                                                    |                                                       |                                              |                                                       |                                                 |                                      |
| <input type="checkbox"/> Told by a physician                                                             | <input type="checkbox"/> Government/License authority                                                                                                                                                                                                                                                                                                                                                                                                                                                                                                                                                                                                                                                                                                                                                                                                                                                                                                                                                                                                                                                                                                                                                                                                                          |                                                    |                                                       |                                              |                                                       |                                                 |                                      |
| <input type="checkbox"/> Crash/Driving incident                                                          | <input type="checkbox"/> Other _____                                                                                                                                                                                                                                                                                                                                                                                                                                                                                                                                                                                                                                                                                                                                                                                                                                                                                                                                                                                                                                                                                                                                                                                                                                           |                                                    |                                                       |                                              |                                                       |                                                 |                                      |
| <b>I currently drive →</b>                                                                               | <p><b>1.</b> What year did you first obtain your driver's license? _____</p> <p><b>2.</b> How many days a week do you drive?<br/><i>(Circle one)</i> 1 2 3 4 5 6 7</p>                                                                                                                                                                                                                                                                                                                                                                                                                                                                                                                                                                                                                                                                                                                                                                                                                                                                                                                                                                                                                                                                                                         |                                                    |                                                       |                                              |                                                       |                                                 |                                      |

***PLEASE FLIP OVER TO ANSWER THE CRSD-IDSQoL***

**Instructions:** The following questions ask how your driving status (meaning whether you drive or not) affects you. Please read each question and all of the response options carefully, and then **circle the answer that appears most appropriate**. If you are unsure about which response to circle, the first response you think of is often the best one. How you feel may change from day to day. When answering these questions, we ask that you think about your life **over the last four weeks** in general.

|                                                                                 | <b>Strongly Disagree</b> | <b>Disagree</b> | <b>Neutral</b> | <b>Agree</b> | <b>Strongly Agree</b> |
|---------------------------------------------------------------------------------|--------------------------|-----------------|----------------|--------------|-----------------------|
| <b>1.</b> A) I am not able to go to the places I need to.                       | 1                        | 2               | 3              | 4            | 5                     |
| B) I feel that this is because of my driving status.                            | 1                        | 2               | 3              | 4            | 5                     |
| <b>2.</b> A) I am able to go to the places I need to <b>when</b> I need to.     | 1                        | 2               | 3              | 4            | 5                     |
| B) I feel that this is because of my driving status.                            | 1                        | 2               | 3              | 4            | 5                     |
| <b>3.</b> A) I am able to attend out-of-home social activities whenever I wish. | 1                        | 2               | 3              | 4            | 5                     |
| B) I feel that this is because of my driving status.                            | 1                        | 2               | 3              | 4            | 5                     |
| <b>4.</b> A) I have a positive outlook on the future.                           | 1                        | 2               | 3              | 4            | 5                     |
| B) I feel that this is because of my driving status.                            | 1                        | 2               | 3              | 4            | 5                     |
| <b>5.</b> A) I have to rely on my family and friends to go to places.           | 1                        | 2               | 3              | 4            | 5                     |
| B) I feel that this is because of my driving status.                            | 1                        | 2               | 3              | 4            | 5                     |
| <b>6.</b> A) I engage in enough physical exercise.                              | 1                        | 2               | 3              | 4            | 5                     |
| B) I feel that this is because of my driving status.                            | 1                        | 2               | 3              | 4            | 5                     |
| <b>7.</b> A) I feel independent.                                                | 1                        | 2               | 3              | 4            | 5                     |
| B) I feel that this is because of my driving status.                            | 1                        | 2               | 3              | 4            | 5                     |
| <b>8.</b> A) I only go on outings when necessary.                               | 1                        | 2               | 3              | 4            | 5                     |
| B) I feel that this is because of my driving status.                            | 1                        | 2               | 3              | 4            | 5                     |

|                                                                                            | <b>Strongly Disagree</b> | <b>Disagree</b> | <b>Neutral</b> | <b>Agree</b> | <b>Strongly Agree</b> |
|--------------------------------------------------------------------------------------------|--------------------------|-----------------|----------------|--------------|-----------------------|
| <b>9.</b> A) I feel socially isolated.                                                     | 1                        | 2               | 3              | 4            | 5                     |
| B) I feel that this is because of my driving status.                                       | 1                        | 2               | 3              | 4            | 5                     |
| <b>10.</b> A) I plan my out-of-home activities carefully around my transportation options. | 1                        | 2               | 3              | 4            | 5                     |
| B) I feel that this is because of my driving status.                                       | 1                        | 2               | 3              | 4            | 5                     |
| <b>11.</b> A) I am concerned that I may be involved in a collision.                        | 1                        | 2               | 3              | 4            | 5                     |
| B) I feel that this is because of my driving status.                                       | 1                        | 2               | 3              | 4            | 5                     |
| <b>12.</b> A) I do not view myself positively.                                             | 1                        | 2               | 3              | 4            | 5                     |
| B) I feel that this is because of my driving status.                                       | 1                        | 2               | 3              | 4            | 5                     |
| <b>13.</b> A) I can easily participate in out-of-home social events.                       | 1                        | 2               | 3              | 4            | 5                     |
| B) I feel that this is because of my driving status.                                       | 1                        | 2               | 3              | 4            | 5                     |
| <b>14.</b> A) I feel frustrated with my life.                                              | 1                        | 2               | 3              | 4            | 5                     |
| B) I feel that this is because of my driving status.                                       | 1                        | 2               | 3              | 4            | 5                     |
| <b>15.</b> A) My transportation needs consume a large proportion of my disposable income.  | 1                        | 2               | 3              | 4            | 5                     |
| B) I feel that this is because of my driving status.                                       | 1                        | 2               | 3              | 4            | 5                     |
| <b>16.</b> A) My transportation needs pose a burden to others.                             | 1                        | 2               | 3              | 4            | 5                     |

|                                                                      | <b>Strongly Disagree</b> | <b>Disagree</b> | <b>Neutral</b> | <b>Agree</b> | <b>Strongly Agree</b> |
|----------------------------------------------------------------------|--------------------------|-----------------|----------------|--------------|-----------------------|
| B) I feel that this is because of my driving status.                 | 1                        | 2               | 3              | 4            | 5                     |
| <b>17.</b> A) I feel that I have control over my life.               | 1                        | 2               | 3              | 4            | 5                     |
| B) I feel that this is because of my driving status.                 | 1                        | 2               | 3              | 4            | 5                     |
| <b>18.</b> A) I am concerned for my personal safety.                 | 1                        | 2               | 3              | 4            | 5                     |
| B) I feel that this is because of my driving status.                 | 1                        | 2               | 3              | 4            | 5                     |
| <b>19.</b> A) I need to be creative in finding ways to go to places. | 1                        | 2               | 3              | 4            | 5                     |
| B) I feel that this is because of my driving status.                 | 1                        | 2               | 3              | 4            | 5                     |
| <b>20.</b> A) Others rely on me to go to places.                     | 1                        | 2               | 3              | 4            | 5                     |
| B) I feel that this is because of my driving status.                 | 1                        | 2               | 3              | 4            | 5                     |
| <b>21.</b> A) I view myself as a complete person.                    | 1                        | 2               | 3              | 4            | 5                     |
| B) I feel that this is because of my driving status.                 | 1                        | 2               | 3              | 4            | 5                     |
